1  
2 **Targeted genome fragmentation with CRISPR/Cas9 improves hybridization capture, reduces PCR**  
3 **bias, and enables efficient high-accuracy sequencing of small targets**  
4

5 Daniela Nachmanson<sup>1</sup>, Shenyi Lian<sup>1†</sup>, Elizabeth K. Schmidt<sup>1</sup>, Michael J. Hipp<sup>1</sup>, Kathryn T. Baker<sup>1</sup>,  
6 Yuezheng Zhang<sup>1</sup>, Maria Tretiakova<sup>1</sup>, Kaitlyn Loubet-Seneor<sup>1</sup>, Brendan F. Kohn<sup>1</sup>, Jesse J. Salk<sup>2‡</sup>, Scott  
7 R. Kennedy<sup>1\*</sup>, Rosa Ana Risques<sup>1\*</sup>  
8

9 <sup>1</sup>Department of Pathology, University of Washington, Seattle, WA 98195, USA. <sup>2</sup>Department of  
10 Medicine, Division of Hematology and Oncology, University of Washington, Seattle, WA 98195, USA.  
11

12 †Current address: Key laboratory of Carcinogenesis and Translational Research (Ministry of  
13 Education/Beijing), Department of Pathology, Peking University Cancer Hospital & Institute, Beijing, PR,  
14 China.

15 ‡ Current address: TwinStrand Biosciences, Seattle, WA 98121, USA.  
16

17 \*These authors contributed equally  
18

19 **Corresponding authors:**

20  
21 Scott Kennedy, PhD  
22 Dept. of Pathology  
23 University of Washington  
24 Box 357470  
25 1959 NE Pacific Ave.  
26 Seattle, WA 98195-7705  
27 (206) 543-5452  
28 [scottrk@uw.edu](mailto:scottrk@uw.edu)  
29  
30

31 Rosa Ana Risques, PhD  
32 Dept. of Pathology  
33 University of Washington  
34 Box 357470  
35 1959 NE Pacific Ave.  
36 Seattle, WA 98195-7705  
37 (206) 616 4976  
38 [rrisques@uw.edu](mailto:rrisques@uw.edu)  
39  
40  
41  
42  
43  
44  
45

46 **ABSTRACT**

47 Current next-generation sequencing techniques suffer from inefficient target enrichment and frequent  
48 errors. To address these issues, we have developed a targeted genome fragmentation approach based  
49 on CRISPR/Cas9 digestion. By designing all fragments to similar lengths, regions of interest can be size-  
50 selected prior to library preparation, increasing hybridization capture efficiency. Additionally,  
51 homogenous length fragments reduce PCR bias and maximize read usability. We combine this novel  
52 target enrichment approach with ultra-accurate Duplex Sequencing. The result, termed CRISPR-DS, is  
53 a robust targeted sequencing technique that overcomes the inherent challenges of small target  
54 enrichment and enables the detection of ultra-low frequency mutations with small DNA inputs.

55

56 **Key words:** Target enrichment, Duplex Sequencing, Next-Generation Sequencing, NGS, CRISPR/Cas9

57

58

59

60

61

62

63

64

65

66

67

68

69

70

71

## 72 **BACKGROUND**

73 In the past decade, NGS has revolutionized the fields of biology and medicine. However, standard  
74 NGS suffers from two major problems that negatively impact multiple applications: the limited efficiency  
75 of the current target selection methods and the high error rate of the sequencing process. Targeted  
76 genome enrichment is essential to many applications that do not require whole genome sequencing and  
77 it is performed either by PCR or by hybridization capture. PCR is simple and efficient but does not scale  
78 well and suffers from biases that result in uneven coverage and false mutation calls [1, 2]. Hybridization  
79 capture improves coverage uniformity and mutation call accuracy but has low recovery, especially when  
80 the target region is small, which leads to the requirement of larger amounts of DNA [2]. An additional  
81 complication is that DNA is typically fragmented by sonication which introduces DNA damage resulting  
82 in sequencing errors [3]. Moreover, the heterogeneous fragment sizes generated by sonication are  
83 subject to PCR bias and contribute to uneven coverage. An alternative option to sonication is enzymatic  
84 fragmentation. This method resolves some issues but introduces different artifacts that also result in  
85 sequencing errors [4]. Thus, at the library preparation step, both methods of target selection suffer  
86 important limitations that lead to non-optimal sequencing outcomes, including uneven coverage,  
87 introduction of false mutations, and low recovery.

88 The second major problem of NGS is the high error rate inherent to the sequencing process.  
89 Illumina offers the most accurate sequencing platform with an estimated error rate of  $10^{-3}$  [5]. This error  
90 rate, however, translates into millions of false calls in each sequencing run and precludes the detection  
91 of low frequency mutations (Additional file 1: Figure S1), which is critical for applications such as  
92 forensics, metagenomics, and oncology [6]. While the accuracy of NGS can be improved by repair of the  
93 DNA prior to sequencing [7, 8] and by computational error correction [9, 10], these strategies do not  
94 remove all potential artifacts. An alternative approach employs unique molecular identifiers, also called  
95 molecular barcodes or molecular tags, to identify the reads derived from an original DNA molecule and  
96 use their redundant information to create a consensus sequence [11]. The unique random shear points  
97 generated at sonication can be used as “endogeneous barcodes”, but only when sequencing depth is

98 low (~10x) to avoid overlapping of sharing points between independent DNA molecules [12]. To enable  
99 higher sequencing depth, exogenous barcodes are necessary. Exogenous barcodes are random DNA  
100 sequences attached to the original DNA molecules before or during PCR. Single-stranded molecular  
101 barcodes produce a consensus with the reads derived from one DNA strand [11], whereas double-  
102 stranded molecular barcodes introduce an additional level of correction by allowing the comparison of  
103 independent consensus sequences derived from the two complementary strands of the original DNA  
104 molecule [13]. This additional level of correction is essential for removing polymerase errors occurring in  
105 the first round of PCR and subsequently propagated to all reads derived from a given DNA strand [7].  
106 Polymerase errors caused by DNA damage are one of the most pervasive problems of NGS [8] but can  
107 be successfully addressed with double-strand barcodes given the extremely low probability that the same  
108 error occurs in the same position on both strands of DNA. Duplex Sequencing (DS), the method that  
109 pioneered double-strand molecular barcodes [13, 14], has an estimated error rate  $<10^{-7}$ , four orders of  
110 magnitude less than single-strand molecular barcode methods. This level of accuracy allows for very  
111 sensitive ultra-deep sequencing (Additional file 1: Figure S1) and has been employed in a variety of  
112 applications including the detection of very low frequency somatic mutations in cancer and aging [15-18].

113 DS successfully addresses the problem of sequencing errors, but it suffers from the limitations of  
114 hybridization capture, which is required to perform target selection while preserving the strand recognition  
115 of molecular barcodes. As described above, hybridization capture is highly inefficient when selecting  
116 small target sizes [19]. It is estimated that for targets  $<50\text{Kb}$  only 5-10% of reads are on-target after  
117 hybridization capture [20]. In DS, as well as in other panel-based sequencing approaches, the region of  
118 interest is usually small as a cost-effective trade-off for higher sequencing depth. In this situation, a  
119 successful approach for target enrichment is to perform two consecutive rounds of capture [20]. However,  
120 this approach results in a time consuming, costly, and inefficient protocol that requires large amounts of  
121 DNA [14]. For example, in DS at least  $1\mu\text{g}$  of DNA was historically needed to produce depths  $>3,000\text{x}$   
122 [17], which is prohibitive in many applications that rely on small samples.

123 Here we present CRISPR-DS, a new method that addresses the two main problems of NGS:  
124 limited efficiency of target selection and high error rate. Target selection is facilitated by an enrichment  
125 of the regions of interest using the CRISPR/Cas9 system. *In vitro* digestion with CRISPR/Cas9 has been  
126 proven to be a useful tool for multiplexed excision of large megabase fragments and repetitive sequence  
127 regions for PCR-free NGS [21, 22]. We reasoned that targeted *in vitro* CRISPR/Cas9 digestion could be  
128 used to excise similar length fragments covering the area of interest, which could then be enriched by  
129 size selection prior to library preparation. We designed this method to enable target enrichment while  
130 simultaneously eliminating sonication-related errors and biases arising from random genome  
131 fragmentation. In addition, by pairing this method with double-strand molecular barcoding, we aimed to  
132 produce a method that preserves the sequencing accuracy of DS, while increasing the recovery rate,  
133 enabling low DNA input and a simplified protocol for translational applications.

134

## 135 RESULTS

### 136 Design of CRISPR-DS based on CRISPR/Cas9 target fragmentation and double strand molecular 137 barcodes

138 CRISPR-DS is based on *in vitro* CRISPR/Cas9 excision of target sequences to generate DNA  
139 molecules of uniform length which are then enriched by size selection. The versatility, specificity, and  
140 multiplexing capabilities of the CRISPR/Cas9 system enable its application for the excision of any target  
141 region of interest by simply designing guide RNAs (gRNA) to the desired cutting points. As a proof of  
142 principle, we developed the method for sequencing the exons of *TP53*. Further, in order to achieve high  
143 recovery as well as high sequencing accuracy, we combined it with DS. The main steps of the protocol  
144 are illustrated in Figure 1. First, target regions are excised from genomic DNA by multiplexed *in vitro*  
145 CRISPR/Cas9 digestion (Fig. 1a), followed by enrichment of the excised fragments by size-selection  
146 using SPRI beads (Fig. 1b). The selected fragments are then coupled with the double-strand molecular  
147 barcodes used in DS (Fig. 1c) [14]. These fragments are then amplified and captured with biotinylated  
148 hybridization probes as previously described for DS [14], with the exception that only one round of

149 hybridization capture is required due to the prior enrichment of target fragments (see below). Finally, the  
150 library is sequenced and the resulting reads are analyzed to perform error correction based on the  
151 consensus sequences of both strands of each DNA molecule (Fig. 1d) [14]. Due to the requirement of  
152 only one round of hybridization capture, the workflow of CRISPR-DS is almost one day shorter than  
153 standard-DS (Fig. 2, Additional file 1: Figure S2), enabling a more cost-efficient and applicable method.

154

### 155 **CRISPR/Cas9 cut fragments can be designed to be of homogenous length, reducing PCR bias** 156 **and producing uniform coverage**

157 Typically, genome fragmentation is performed with sonication, which generates randomly sized  
158 fragments that have different amplification efficiencies [23]. Short fragments are preferentially amplified,  
159 resulting in uneven coverage of the regions of interest and decreased recovery. In DS, amplification bias  
160 introduces an additional problem because short fragments produce an excess of PCR copies that do not  
161 further aid error reduction. To produce a consensus, only three PCR copies of the same molecule are  
162 required. Additional copies waste resources because they produce sequencing reads but do not generate  
163 additional data. By using CRISPR/Cas9, gRNA can be designed such that restriction with Cas9 produces  
164 fragments of predefined, homogeneous size. We reasoned that these fragments would eliminate PCR  
165 bias, leading to homogeneous sequencing coverage and minimizing wasted reads that are PCR copies  
166 of the same original molecule.

167 To test this approach, we designed gRNAs to specifically excise the coding regions and their  
168 flanking intronic sequence of *TP53* (Fig. 1a). Fragment length was designed to be ~500bp in order to  
169 maximize read space of an Illumina MiSeq v3 600 cycle kit while allowing for sequencing of the molecular  
170 barcode (10 bp) and 3'-end clipping of 30bp to remove low-quality bases produced in the later sequencing  
171 cycles. gRNAs were selected based on the highest specificity score that produced appropriate fragment  
172 length (Additional file 2: Table S1, Additional file 3: Data S1) [24]. The fragment comprising exon 7 was  
173 designed shorter than the rest (336 bp) to avoid a homopolymeric run of T's in the flanking intronic region  
174 which induced poor base quality in reads that span this region (Additional file 1: Figure S3).

175 We performed a side-by-side comparison of library performance (Fig. 3a-c) and sequencing  
176 coverage (Fig. 3d) of a sample DNA processed with CRISPR-DS vs standard-DS (see Material and  
177 Methods). Standard-DS for *TP53* had been previously performed using sonication and published  
178 protocols [14, 17]. Visualization of the resulting sequencing library by gel electrophoresis showed that  
179 CRISPR restriction produced distinct bands/peaks (Fig. 3a-b) corresponding to the predesigned size of  
180 target fragments as opposed to the diffuse “smear” characteristic of libraries prepared by sonication. The  
181 discrete peaks allow confirmation of correct library preparation and target enrichment, preventing the  
182 sequencing of suboptimal libraries. Sequencing and mapping of the libraries demonstrated that targeted  
183 Cas9 restriction results in well-defined DNA fragments corresponding to the expected size (Fig. 3d).  
184 Importantly, these fragments exhibited extremely uniform sequencing depth. In contrast, sonicated DNA  
185 fragments resulted in significant variability in depth across target regions. Because DS reads correspond  
186 to individual DNA molecules, the uniform depth achieved by CRISPR-DS indicates a homogenous  
187 representation of the original genomic DNA in the final sequencing output, confirming the proper excision  
188 of all fragments.

189 The ability to uniformly control the DNA insert size should not only provide homogenous depth,  
190 but should also produce a more uniform number of copies of each molecule, minimizing the waste of  
191 unnecessary reads to produce a consensus sequence. To test this possibility, we counted the number of  
192 PCR copies for each molecular barcode and plotted it as a function of the DNA fragment size (Fig. 3c).  
193 Sonicated DNA exhibited a strongly negative association between DNA fragment size and the number of  
194 PCR copies, as expected due to the fact that small DNA fragments are preferentially amplified (Fig. 3c,  
195 *blue*). In contrast, targeted fragmentation produced a consistent number of PCR copies for all fragments,  
196 including the smaller exon 7 fragment (Fig. 3c, *red*).

197

### 198 **CRISPR/Cas9 cut fragments can be designed to be of optimal length to maximize read usage**

199 An additional disadvantage of the variable fragment size produced by sonication is inefficient read  
200 usage: fragments that are too short generate overlapping reads that waste sequencing space, whereas

201 fragments that are too long get sequenced on the ends, leaving captured but un-sequenced DNA in the  
202 middle (Fig. 4a). The programmable nature of Cas9 can be leveraged to reduce the amount of data “lost”  
203 by generating optimal length fragments tailored to the preferred number of sequencing cycles. To  
204 illustrate the improvement in read usage, we quantified the amount of deviation from the optimal fragment  
205 size (defined as the total number of sequencing cycles minus the total length of the molecular barcodes  
206 and 3'-end clipping) of seven samples independently processed with sonication and targeted  
207 fragmentation. Sonication produced significant variability in the amount of deviation from the optimal  
208 fragment size with a large fraction of fragments being twice the optimal size for one of the samples (Fig.  
209 4b,c; Additional file 1: Figure S4). Indeed, only  $9.1\pm 4.2\%$  of reads had inserts that were within 10%  
210 deviation from the optimal fragment length. Even samples with more stringent size selection had only  
211 ~61% of reads within the 10%-deviation window (Fig. 4c; Additional file 1: Figure S4). In contrast, the  
212 same samples fragmented with Cas9 had  $71.0\pm 3.2\%$  of reads within the same window range, with the  
213 vast majority of the reads outside the window being due the purposefully shorter Exon 7 fragment (Fig.  
214 4b,c; Additional file 1: Figure S3, S4). Exclusion of exon 7 from this analysis improved the percent of  
215 reads within the 10%-deviation window to  $94.3\pm 2.1\%$ . These data indicate that targeted fragmentation  
216 can tightly control the fragment size to optimize read usage, thereby increasing the efficiency of  
217 sequencing.

218

## 219 **CRISPR/Cas9 fragmentation enables target enrichment by size selection, eliminates one round of** 220 **hybridization capture, and increases sequencing yield**

221 While performing two rounds of capture substantially increases the number of on-target reads for  
222 standard-DS and other small target applications, the process is time consuming, expensive, and requires  
223 additional PCR steps that introduce further bias [20]. We hypothesized that target enrichment via size  
224 selection of CRISPR/Cas9 digested fragments would sufficiently enrich for on-target DNA fragments and  
225 eliminate the need for a second capture. To test this hypothesis, we performed CRISPR/Cas9 digestion  
226 of targeted *TP53* exons (Fig. 1a) on a range of DNA input amounts (10-250ng) followed by SPRI size



227 selection to remove undigested high molecular weight DNA fragments (> 1kb in size). The selected DNA  
228 fragments were ligated to DS adapters, PCR amplified, and sequenced (see Material and Methods). No  
229 hybridization capture or any other type of target enrichment was performed. Mapping of raw reads  
230 revealed between 0.2% to 5% reads on-target, corresponding to ~2,000x to 50,000x fold enrichment  
231 given the fact that our target region only amounted for 0.000101% of the human genome (Table 1). This  
232 level of enrichment matches or exceeds what is typically achieved with solution based hybridization for  
233 small target size [19, 20]. Notably, lower DNA inputs showed the highest enrichment, potentially reflecting  
234 more efficient digestion or improved removal of off-target, high molecular weight DNA fragments when  
235 they are in lower abundance. These results suggested that a simple size selection step can be used in  
236 lieu of a targeted hybridization enrichment step.

237 To test this possibility, we performed a side by side comparison of standard-DS [14] with one and  
238 two rounds of hybridization capture vs. CRISPR-DS with only one round of hybridization capture. Three  
239 input amounts of the same control DNA extracted from normal human bladder tissue were sequenced in  
240 parallel for each of the methods. CRISPR-DS with one round of capture achieved >90% raw reads on-  
241 target (e.g. covering *TP53*) (Fig. 5a), a significant improvement over standard-DS which only achieved  
242 ~5% raw reads on-target with a single capture, consistent with prior work [20]. In an independent  
243 experiment, we tested the reproducibility of this result with three different DNA samples that were  
244 sequenced with CRISPR-DS using one and two rounds of capture (Additional file 1: Figure S5).  
245 Confirming the prior result, the three samples produced >90% raw reads on target using only one round  
246 of capture. The second round of capture only minimally increased raw reads on-target and is  
247 unnecessary.

248 The side-by-side comparison of CRISPR-DS vs standard-DS also demonstrated a substantial  
249 increase in recovery using CRISPR-DS. Sequencing recovery, also referred to as yield, is typically  
250 measured as the fraction or percentage of sequenced genomes compared to input genomes. Consistent  
251 with prior studies[13, 17], standard-DS produced a recovery rate of ~1% across the different inputs, while  
252 CRISPR-DS recovery rate ranged between 6 and 12% (Fig. 5b). Notably, 25ng of DNA prepared with

253 CRISPR-DS produced a post-processing depth comparable to 250ng with standard-DS. This indicates that  
254 size selection for CRISPR/Cas9 excised fragments not only removes a step from the library preparation  
255 but, most importantly, increases the recovery of input DNA enabling deep sequencing with greatly reduced  
256 DNA requirements.

257

### 258 **Validation of CRISPR-DS recovery in an independent set of samples, including low quality DNA**

259 We further confirmed the performance of CRISPR-DS in an independent set of 13 DNA samples  
260 extracted from bladder tissue (Additional file 2: Table S3). We used 250ng and obtained a median DCS  
261 depth of 6,143x, corresponding to a median recovery rate of 7.4% in agreement with the prior experiment.  
262 Reproducible performance was demonstrated with technical replicates for two samples (B2 and B4,  
263 Additional file 2: Table S3). All samples had >98% reads on-target after consensus making, but the  
264 percentage of on-target raw reads ranged from 43% to 98%. We noticed that the low target enrichment  
265 corresponded to samples with DNA Integrity Number (DIN) <7. DIN is a measure of genomic DNA quality  
266 ranging from 1 (very degraded) to 10 (not degraded) [25]. We reasoned that degraded DNA compromises  
267 enrichment by size selection, and the poor yield could be mitigated by removing low molecular weight DNA  
268 prior to CRISPR/Cas9 digestion. To test this hypothesis, we used the pulse-field feature of the BluePippin  
269 system to select high molecular weight DNA (> 8kb) from two samples with degraded DNA (DINs 6 and 4).  
270 This pre-enrichment resulted in successful removal of low molecular weight products and increased on-  
271 target raw reads by 2-fold and DCS depth by 5-fold (Additional file 1: Figure S6). These results indicate that  
272 enrichment of high molecular weight DNA could be used as a solution for successful CRISPR-DS  
273 performance in partially degraded DNA.

274

### 275 **Validation of CRISPR-DS for the detection of low-frequency mutations**

276 To validate the ability of CRISPR-DS to detect low-frequency mutations, we analyzed four peritoneal  
277 fluid samples collected during debulking surgery from women with ovarian cancer and previously analyzed  
278 for *TP53* mutations using the standard-DS protocol [17]. The tumor mutation was previously identified in

279 the four samples: in one sample at a high frequency (68.5%) and at a very low frequency (around or below  
280 1%) in the remaining 3 samples. CRISPR-DS detected the tumor mutation in all samples at frequencies  
281 comparable to what was reported in the original study (Table 2) [17]. In addition to the tumor mutation,  
282 standard-DS also revealed the presence of additional exonic *TP53* mutations in these samples which were  
283 at an extremely low frequency (<0.1%) in all cases. These mutations are considered “biological  
284 background” mutations to distinguish them from the tumor-derived mutations [17]. Standard-DS revealed  
285 between 1 to 5 biological background mutations in each of the samples, representing an overall mutation  
286 frequency of about  $\sim 1 \times 10^{-6}$ . Similarly, CRISPR-DS identified biological background mutations in the 4  
287 samples at a comparable overall mutation frequency (Additional file 1: Figure S7). These results indicate  
288 that CRISPR-DS preserves the sequencing accuracy and sensitivity for mutation detection previously  
289 described for DS [13, 17].

290 Table 2 also illustrates a critical advantage of CRISPR-DS compared to standard-DS in terms of  
291 translational applicability: the reduced requirement of input DNA as a result of a more efficient library  
292 preparation method that enables higher recovery. Standard-DS of these peritoneal fluid samples required  
293 between 3-10  $\mu\text{g}$  of DNA to compensate for the  $\sim 1\%$  recovery rate of standard-DS and to achieve the high  
294 depth necessary to detect low frequency tumor mutations. With CRISPR-DS we only used 100ng of DNA  
295 (30-100 fold less than what was used for standard-DS), and we obtained comparable DCS depth to  
296 standard-DS (Table 2). Recovery rates ranged between 6 and 12%, as in prior experiments (Fig. 5 and  
297 Additional file 2: Table S3). These results represent an efficiency increase of 15x-200x compared to  
298 standard-DS with the same DNA. Notably, CRISPR-DS not only preserved sensitivity for mutation  
299 detection, increased sequencing recovery, and reduced DNA input, but also shortened the protocol by  
300 nearly one day (Additional file 1: Figure S2), making it a more cost effective option for accurate deep  
301 sequencing of samples with limited DNA amounts.

302

303 **DISCUSSION**

304 While CRISPR-based target enrichment can be applied to any sequencing method that requires  
305 hybridization capture of small targets, here we have leveraged its qualities for the optimization of DS,  
306 producing a new method called CRISPR-DS. CRISPR-DS merges the increases in efficiency provided  
307 by CRISPR-based targeted genome fragmentation with the high accuracy of sequencing provided by  
308 double strand molecular barcodes, thus enabling ultra-accurate sequencing of small target regions using  
309 minimal DNA inputs. In addition to CRISPR-DS, the CRISPR-based target enrichment approach can be  
310 used in combination with other methods for targeted sequencing to improve recovery of small targets and  
311 to reduce PCR bias and uneven coverage arising from random fragment sizes.

312 Targeted sequencing remains a cost effective alternative to whole genome-sequencing,  
313 especially when high depth is desired [2]. In multiple applications, such as oncology, the goal is to  
314 sequence a small panel of relevant genes with high accuracy in order to find low frequency mutations.  
315 While the selected target panel can be amplified by PCR, this method creates uneven coverage and false  
316 mutations, thus hybridization capture is typically preferred [2]. Hybridization capture improves coverage  
317 uniformity and removes certain artifactual mutations but does not resolve these issues completely. A  
318 major disadvantage in hybridization-based sequencing methods is the reliance on sonication for genome  
319 fragmentation which generates DNA fragments of random size. We have demonstrated that this size  
320 heterogeneity generates two problems that can be solved by replacing sonication with CRISPR-based  
321 genome fragmentation. The first problem is PCR bias, which results in the preferential amplification of  
322 short DNA fragments. PCR bias leads to wasted reads that contain an excess of PCR copies of the same  
323 molecule. While these reads can be removed bioinformatically [26], the amplification advantage of certain  
324 molecules can lead to uneven coverage and reduced recovery [27]. In methods that employ molecular  
325 barcodes, such as DS, three PCR copies are typically sufficient to generate a consensus sequence [14].  
326 Thus, additional sequencing of PCR copies does not produce additional data and only wastes resources.  
327 We have demonstrated that with CRISPR-based fragmentation all fragments amplify similarly. This  
328 homogeneous amplification translates into uniform coverage across all targeted regions, a critical feature  
329 when the goal is to detect low frequency mutations in selected panel of genes.

330           The second problem associated with the heterogeneous fragment sizes relates to reduced data  
331 yield at the read level. Because sonication allows minimal control over fragment size, a large proportion  
332 of fragments are typically too short or too long compared to the optimal length size determined by the  
333 number of sequencing cycles. When reads are too short, paired-end reads overlap and the middle region  
334 is double-sequenced. Conversely, when reads are too long, the middle part of the DNA fragment, which  
335 may contain a variant or region of interest, remains un-sequenced. This inefficient read usage is solved  
336 with CRISPR-based target selection because the fragments are tailored to the desired read length.

337           CRISPR-based target fragmentation also offers two additional advantages. First, homogeneously  
338 sized DNA fragments can be visualized to confirm library target enrichment prior to sequencing. In  
339 sonication-based hybridization capture, the gel electrophoresis for a target-enriched library looks identical  
340 to a library with no target enrichment. This issue can result in the costly waste of a sequencing run where  
341 the majority of reads are in off-target regions. We show that the defined fragment lengths created by  
342 CRISPR-based digestion produce distinct peaks which are easily visualized and confirm that the  
343 sequencing library is target-enriched. A second advantage of Cas9 digestion over sonication is the  
344 elimination of sonication-induced sequencing errors [3] and the preservation of double stranded DNA at  
345 the ends of fragments. Sonication produces ssDNA at the end of molecules which is susceptible to  
346 damage and converted into “pseudo-dsDNA” by end repair. This process has the potential to introduce  
347 false variant calls, but it is prevented by CRISPR-DS because Cas9 produces blunt ends which do not  
348 require end repair.

349           In the context of small target sequencing by hybridization-capture, the major advantage  
350 introduced by CRISPR-based target enrichment is increased recovery, that is, percentage of input  
351 genomes that produce sequencing data. Hybridization capture is notably inefficient, especially for small  
352 target regions [19, 20]. As demonstrated with our experiments and in agreement with prior studies, the  
353 average recovery rate of DS is ~1% which translates to at least 1  $\mu$ g of DNA being needed to produce  
354 an average depth of ~3,000x. This recovery is improved 10-fold by the addition of CRISPR-based target  
355 enrichment and the elimination of one round of capture. We have demonstrated that by simply excising

356 the genomic regions of interest and performing size selection, we can achieve a level of enrichment  
357 comparable to a single round of capture. By performing this step prior to library preparation, only one  
358 round of hybridization capture is needed, greatly minimizing DNA loss and increasing recovery.  
359 Therefore, using CRISPR-based target enrichment prior to DS achieves the same depth with 10 times  
360 less DNA.

361 To take advantage of the accuracy of DS while enabling low DNA inputs, several groups have  
362 developed DS-based approaches that combine endogenous and exogenous barcodes. Yet each comes  
363 with its own set of compromises. BotSeqS, iDES, and SIP-HAVA-Seq all use DS-based error correction  
364 and require little DNA input [12, 28, 29], but the reliance on endogenous barcodes means that depth is  
365 limited in order to keep shearing points unique. BiSeqS uses chemical conversions to distinguish one  
366 strand from another in combination with molecular barcodes [30] which allows for an increased recovery  
367 and high sequencing depth. However, as a consequence of the chemical conversions, it is unable to  
368 detect all mutation types. In contrast, CRISPR-DS preserves the sequencing accuracy of DS because it  
369 relies exclusively on exogenous double strand molecular barcodes, and the error correction method and  
370 analytical algorithms remain identical to standard-DS. We have demonstrated that CRISPR-DS identified  
371 very low frequency mutations previously detected by DS, confirming its sensitivity. Remarkably this  
372 validation experiment was performed with 10 to 100 times less DNA than the original standard-DS  
373 experiment, illustrating a significant improvement in recovery that will enable the use of the extreme  
374 sensitivity of DS for mutation detection in samples with low input DNA.

375 Though CRISPR-DS addresses several needs in targeted NGS, it could still benefit from  
376 optimizations. First, improvements could be made to increase the recovery of degraded samples.  
377 Currently, in order to perform efficient target enrichment with CRISPR/Cas9 digestion and size selection,  
378 degraded samples must be pre-processed to remove low molecular weight fragments. We performed  
379 this pre-processing using electrophoretic size selection with the BluePippin system. However, to minimize  
380 loss of DNA, high molecular weight DNA could be selected with alternative methods such as micro-  
381 column filters. Second, we noticed that the best recovery was achieved with smaller inputs of DNA. Since

382 our goal was to achieve higher depth with smaller amounts of input DNA, this was not problematic.  
383 However, further efforts should be directed to improve recovery from larger DNA inputs as well. Lastly,  
384 although CRISPR-DS provides an effective solution for small-target region deep sequencing, the method  
385 becomes costly for deep sequencing of large genomic regions, an inherent problem of deep sequencing.  
386 Nevertheless, fragmentation by CRISPR/Cas9 followed by size selection for fragments as a generic  
387 target enrichment technique can easily be scaled to many genomic regions as each region only requires  
388 the addition of the appropriate gRNAs for target excision. Thus, CRISPR-DS is ideal for small to moderate  
389 size panels (1-100Kb) that require ultra-sensitive mutation detection with minimal DNA inputs.

390

## 391 **CONCLUSION**

392 We have demonstrated that CRISPR/Cas9 fragmentation followed by size selection enables efficient  
393 target enrichment, increasing the recovery of hybridization capture and eliminating the need for a second  
394 round of capture for small target regions. In addition, it eliminates PCR bias, maximizes the use of  
395 sequencing resources, and produces homogeneous coverage. This fragmentation method can be  
396 applied to multiple sequencing modalities that suffer from these problems. Here we have applied it to DS  
397 in order to produce CRISPR-DS, an efficient, highly accurate sequencing method with significantly  
398 reduced input DNA requirements. CRISPR-DS has broad application for the sensitive identification of  
399 mutations in situations in which samples are DNA-limited, such as forensics and early cancer detection.

400

## 401 **METHODS**

402

403 **Samples.** The samples analyzed included de-identified human genomic DNA from peripheral blood,  
404 bladder with and without cancer, and peritoneal fluid DNA from a prior study [17]. Only peritoneal fluid  
405 samples had patient information available, which was necessary to confirm the tumor mutation. The  
406 remainder of the study samples were used solely to illustrate technical aspects of the technology, no  
407 patient information was available, and interpretation of the mutational status of *TP53* is not reported.

408 Frozen bladder samples were obtained from unfixed or frozen autopsy tissue. DNA was extracted with  
409 the QIAamp DNA Mini kit (Qiagen, Inc., Valencia, CA, USA) and it had never been denatured, which is  
410 essential to preserve the double-stranded nature of each DNA molecule prior to ligation of DS adapters.  
411 DNA was quantified with a Qubit HS dsDNA kit (ThermoFisher Scientific). DNA quality was assessed  
412 with Genomic TapeStation (Agilent, Santa Clara, CA) and DNA integrity numbers (DIN) were recorded.  
413 Peripheral blood DNA and peritoneal fluid DNA had  $DIN > 7$  reflecting good quality DNA with no  
414 degradation. Bladder samples, however, were purposely selected to include different levels of DNA  
415 degradation. Samples B1 to B13 had DINs between 6.8 and 8.9 and were successfully analyzed by  
416 CRISPR-DS (Additional file 2: Table S3). Samples B14 and B16 had DINs of 6 and 4, respectively, and  
417 were used to demonstrate pre-enrichment of high molecular weight DNA with the BluePippin system (see  
418 below and Additional file 1: Figure S6).

419

420 **CRISPR guide design.** CRISPR/Cas9 uses a gRNA to identify the site of cleavage. gRNAs are  
421 composed of a complex of CRISPR RNA (crRNA), which contains the ~20bp unique sequence  
422 responsible for target recognition, and a trans-activating crRNA (tracrRNA), which has a universal  
423 sequence [31]. To select the best gRNAs to excise *TP53* exons we used the CRISPR MIT design website  
424 (<http://CRISPR.mit.edu>). The selection criteria were: (1) production of fragments of ~500bp covering  
425 exons 2-11 of *TP53* and (2) highest MIT website score (Additional file 2: Table S1 and Additional file 3:  
426 Data S1). For exon 7, a smaller size fragment was required in order to avoid a proximal poly-T repeat  
427 (Additional file 1, Figure S3) . We designed a total of 12 gRNA, which excised *TP53* into 7 different  
428 fragments (Figure 1a). All gRNA had scores  $> 60$ . 10 gRNAs were successful with the first chosen  
429 sequence and 2 had to be redesigned due to poor cutting. Initially, the quality of the cut was assessed  
430 by reviewing the alignment of the final DCS reads with Integrative Genomics Viewer [32]. Successful  
431 guides produced a typical coverage pattern with sharp edges in region boundaries and proper DCS depth  
432 (Figure 3d). Unsuccessful guides led to a drop in DCS depth and the presence of long reads that spanned  
433 beyond the expected cutting point. In order to simplify and speed up the assessment of guides, we



434 designed a synthetic GeneBlock DNA fragment (IDT, Coralville, IA) that included all gRNA sequences  
435 interspaced with random DNA sequences (Additional file 3: Data S2). 3ng of GeneBlock DNA were  
436 digested with each of the gRNAs using the CRISPR/Cas9 *in vitro* digestion protocol described below.  
437 After digestion, the reactions were analyzed by TapeStation 4200 (Agilent Technologies, Santa Clara,  
438 CA, USA) (Additional file 1: Figure S9). The presence of predefined fragment lengths confirms: (1) Proper  
439 gRNA assembly (2) The ability of the gRNA to cleave the designed site.

440

441 **CRISPR/Cas9 *in vitro* digestion of genomic DNA.** The *in vitro* digestion of genomic DNA with *S.*  
442 *pyogenes* Cas9 Nuclease requires the formation of a ribonucleoprotein complex, which both recognizes  
443 and cleaves a pre-determined site. This complex is formed with gRNAs (crRNA + tracrRNA) and Cas9.  
444 For multiplex cutting, the gRNAs can be complexed by pooling all the crRNAs, then complexing with  
445 tracrRNA, or by complexing each crRNA and tracrRNA separately, then pooling. The second option is  
446 preferred because it eliminates competition between crRNAs. gRNAs are at risk of quick degradation and  
447 repeated cycles of freeze-thawing should be avoided. crRNAs and tracrRNAs (IDT, Coralville, IA) were  
448 complexed into gRNAs and then 30nM of gRNAs were incubated with Cas9 nuclease (NEB, Ipswich,  
449 MA) at ~30nM, 1x NEB Cas9 reaction buffer, and water in a volume of 23-27  $\mu$ L at 25°C for 10 min. Then,  
450 10-250ng of DNA was added for a final volume of 30  $\mu$ L. The reaction was incubated overnight at 37°C  
451 and then heat shocked at 70°C for 10 min to inactivate the enzyme.

452

453 **Size Selection.** Size selection for the predetermined fragment length is critical for target enrichment prior  
454 to library preparation. AMPure XP Beads (Beckman Coulter, Brea, CA, USA) were used to remove off-  
455 target, un-digested high molecular weight DNA. After heat inactivation, the reaction was combined with  
456 a 0.5x ratio of beads, briefly mixed, and then incubated for 3 min to allow the high molecular weight DNA  
457 to bind. The beads were then separated from the solution with a magnet and the solution containing the  
458 targeted DNA fragment length was transferred into a new tube. This was followed by a standard AMPure

459 1.8x ratio bead purification eluted into 50  $\mu$ L of TE Low to exchange the buffer and remove small DNA  
460 contaminants.

461

462 **A-tailing, and ligation.** The fragmented DNA was A-tailed and ligated using the NEBNext Ultra II DNA  
463 Library Prep Kit (NEB, Ipswich, MA) according to manufacturer's protocol. The NEB end-repair and A-  
464 tailing (ERAT) reaction was incubated at 20°C for 30 min and 65°C for 30 min. Note that end-repair is not  
465 needed for CRISPR-DS because Cas9 produces blunt ends, but the ERAT reaction was used for  
466 convenient A-tailing. The NEB ligation mastermix and 2.5 $\mu$ l of DS adapters at 15  $\mu$ M were added and  
467 incubated at 20°C for 15 min according to the manufacturer's instructions. Instead of relying on in-house  
468 manufactured adapters using previously published protocols [13, 14], which tend to exhibit substantial  
469 batch-to-batch variability, we used a commercial adapter prototype of the structure shown in Fig. 1c that  
470 were synthesized externally through arrangement with TwinStrand Biosciences. The two differences from  
471 the previous adapters are: (1) 10bp random double stranded molecular tag instead of 12bp and (2)  
472 substitution of the previous 3' 5bp conserved sequence by a simple 3'-dT overhang to ligate onto the 5'-  
473 dA-tailed DNA molecules. Upon ligation, the DNA was cleaned by a 0.8X ratio AMPure Bead purification  
474 and eluted into 23  $\mu$ L of nuclease free water.

475

476 **PCR.** The ligated DNA was amplified using KAPA Real-Time Amplification kit with fluorescent standards  
477 (KAPA Biosystems, Woburn, MA, USA). 50 $\mu$ l reactions were prepared including KAPA HiFi HotStart  
478 Real-time PCR Master Mix, 23 $\mu$ l of previously ligated and purified DNA and DS primers MWS13, 5'-  
479 AATGATACGGCGACCACCGAG-3', and MWS20, 5'- GTGACTGGAGTTCAGACGTGTGC-3' [13, 14] at  
480 a final concentration of 2  $\mu$ M. The reactions were denatured at 98°C for 45 sec and amplified with 6-8  
481 cycles of 98°C for 15 sec, 65°C for 30 sec, and 72°C for 30 sec, followed by final extension at 72°C for 1  
482 min. Samples were amplified until they reached Fluorescent Standard 3, which typically takes 6-8 cycles  
483 depending on the amount of DNA input. Reaching Fluorescent Standard 3 produces a sufficient and

484 standardized number of DNA copies into capture across samples and prevents over-amplification. A 0.8X  
485 ratio AMPure Bead wash was performed to purify the amplified fragment and eluted into 40µL of nuclease  
486 free water.

487

488 **Capture and post-capture PCR.** *TP53* xGen Lockdown Probes (IDT, Coralville, IA) were used to  
489 perform hybridization capture for *TP53* exons as previously reported with minor modifications. From the  
490 pre-designed IDT *TP53* Lockdown probes, we selected 21 probes that cover the entire *TP53* coding  
491 region (exon 1 and part of exon 11 are not coding) (Additional file 2: Table S2). Each CRISPR/Cas9  
492 excised fragment was covered by at least 2 probes and a maximum of 5 probes (Additional file 3: Data  
493 S1). To produce the capture probe pool, each of the probes for a given fragment was pooled in equimolar  
494 amounts, producing 7 different pools, one for each fragment. The pools were mixed again in equimolar  
495 amounts, except for the pools for exon 7 and exons 8-9, which were represented at 40% and 90%  
496 respectively. The decrease of capture probes for those exons was implemented after observing  
497 consistent overrepresentation of these exons at sequencing. The final capture pool was diluted to 0.75  
498 pmol/µl. Of note, it is essential to dilute the capture pool in low TE (0.1 mM EDTA) and to aliquot it in  
499 small volumes suitable for 2-3 uses. Excessive rounds of freeze-thaw severely impact the efficiency of  
500 the protocol. Hybridization capture was performed according to the IDT protocol, except for 3  
501 modifications. First, we used blockers MWS60, 5'-  
502 AATGATACGGCGACCACCGAGATCTACACTCTTCCCTACACGACGCTCTTCCGATCTIIIIIIIIITGA  
503 CT-3' and MSW61, 5'-GTCAIIIIIIIIIIAGATCGGAAGAGCACACGTCTGAACTCCAGTCAC-3', which are  
504 specific to DS adapters. Second, we used 75µl of Dynabeads M-270 Streptavidin beads instead of 100µl.  
505 Third, the post-capture PCR was performed with the KAPA Hi-Fi HotStart PCR kit (KAPA Biosystems,  
506 Woburn, MA, USA) using MWS13 and indexed primer MWS21 at a final concentration of 0.8 µM. The  
507 reaction was denatured at 98°C for 45 sec and then amplified for 20 cycles at 98°C for 30 sec, 60°C for

508 45 sec, and 72°C for 45 sec, followed by extension at 72°C for 60 sec. The PCR product was purified  
509 with a 0.8X AMPure Bead wash.

510

511 **Sequencing.** Samples were quantified using the Qubit dsDNA HS Assay Kit, diluted, and pooled for  
512 sequencing. The sample pool was visualized on the Agilent 4200 TapeStation to confirm library quality.  
513 The TapeStation electropherogram should show sharp, distinct peaks corresponding to the fragment  
514 length of the designed CRISPR/Cas9 cut fragments (Fig. 3b-c). This step can also be performed for each  
515 sample individually, prior to pooling, to verify the performance of each individual sample. The final pool  
516 was quantified using the KAPA Library Quantification kit (KAPA Biosystems, Woburn, MA, USA). The  
517 library was sequenced on the MiSeq Illumina platform using a v3 600 cycle kit (Illumina, San Diego, CA,  
518 USA) as specified by the manufacturer. For each sample, we allocated ~7-10% of a lane corresponding  
519 to ~2 million reads. Each sequencing run was spiked with approximately 1% PhiX control DNA.

520

521 **Standard-DS experiments.** Three amounts of DNA (25ng, 100ng, and 250ng) from normal human  
522 bladder sample B9 were sequenced with standard-DS with one round and two rounds of capture to  
523 provide direct comparison with CRISPR-DS. Standard-DS was performed as previously described [14],  
524 with the exception that the KAPA Hyperprep kit (KAPA Biosystems, Woburn, MA, USA) was used for  
525 end-repair and ligation and the KAPA Hi-Fi HotStart PCR kit (KAPA Biosystems, Woburn, MA, USA) was  
526 used for PCR amplification. Hybridization capture was performed with xGen Lockdown probes that  
527 covered *TP53* exons 2-11, the same that were used for CRISPR-DS. Samples were sequenced on ~10%  
528 of a HiSeq 2500 Illumina platform to accommodate shorter fragment lengths. Data analysis was perform  
529 with the standard-DS analysis pipeline (<https://github.com/risqueslab/DuplexSequencingScripts>).

530

531 **CRISPR-DS target enrichment experiments.** Two different experiments were performed to  
532 characterize CRISPR-DS target enrichment. The first experiment consisted of comparing one vs. two  
533 rounds of capture. Three DNA samples were processed for CRISPR-DS and split in half after one

534 hybridization capture. The first half was indexed and sequenced and the second half was subject to an  
535 additional round of capture, as required in the original DS protocol. Then the percentage of raw reads  
536 on-target (covering *TP53* exons) was compared for one vs. two captures. The second experiment  
537 assessed the percentage of raw reads on-target without performing hybridization capture to determine  
538 the enrichment produced exclusively by size selecting CRISPR excised fragments. Fold-enrichment was  
539 calculated as the fraction of on-target raw reads divided over the expected fraction of on-target reads  
540 given the size of the target region (bases in the target region/total genome bases). Different DNA amounts  
541 (from 10ng to 250ng) of three different samples were processed with the protocol described above until  
542 first PCR, that is, prior to hybridization capture. Then the PCR product was indexed and sequenced. The  
543 percentage of raw reads on-target was calculated and the fold enrichment was estimated considering the  
544 size of the targeted region, which is 3,280bp.

545

546 **Pre-enrichment for high molecular weight DNA.** Selection of high molecular weight DNA improves the  
547 performance of degraded DNA in CRISPR-DS. We performed this selection using a BluePippin system  
548 (Sage Science, Beverly, MA). Two bladder DNAs with DINs of 6 and 4 were run using a 0.75% gel  
549 cassette and high-pass setting to obtain >8kb fragments. Size selection was confirmed by TapeStation  
550 (Additional file 1: Figure S6a). Then 250ng of DNA before BluePippin and 250ng of DNA after BluePippin  
551 were processed in parallel with CRISPR-DS. The percentage of raw reads on-target as well as average  
552 DCS depth was quantified and compared (Additional file 1: Figure S6b.). Alternative methods for size  
553 selection such as AMPure beads might be suitable to perform this enrichment.

554

555 **Data processing.** A custom bioinformatics pipeline was created to automate analysis from raw FASTQ  
556 files to text files (Additional file 1: Figure S8). This pipeline includes two major modifications compared to  
557 the previously described method for DS analysis [13, 14]: (1) the retention of paired read information and  
558 (2) consensus-making performed prior to alignment. Paired-end reads are essential to the analysis of  
559 CRISPR-DS data, but are also an important improvement for the analysis of DS in general, as they allow

560 critical quality control of fragment size and removal of potential technical artifacts related to short  
561 fragments. In this pipeline, consensus is executed by a custom python and bash scripts. After consensus  
562 calling, the resulting processed FASTQ files are aligned to the reference genome of interest, in this case  
563 human reference genome v38, using bwa-mem v.0.7.4[33] with default parameters. Mapped reads are  
564 re-aligned with GATK Indel-Realigner and low quality bases are clipped from the ends with GATK Clip-  
565 Reads (<https://software.broadinstitute.org/gatk/>). Because of the expected decrease in read quality in the  
566 latest cycles of sequencing, we performed a conservative clipping of 30 bases from the 3' end and  
567 another 7 bases from 5' end were clipped to avoid the occasional extra overhang left by incorrectly  
568 synthesized adapters. In addition, overlapping areas of read-pairs, which in our *TP53* design spanned  
569 ~80bp, are trimmed back using fgbio ClipOverlappingReads (<https://github.com/fulcrumgenomics/fgbio>).  
570 Software for CRISPR-DS is available at <https://github.com/risqueslab/CRISPR-DS>.

571

572 **Data analysis.** Recovery rate (also called fractional genome-equivalent recovery) was calculated as  
573 average DCS depth (sequenced genomes) divided by number of input genomes (1ng of human genomic  
574 DNA corresponds to ~330 haploid genomes). The number of on-target raw reads was calculated by  
575 counting the number of reads within 100bp window on either side of the CRISPR/Cas9 cut sites. Optimal  
576 fragment size (Fig. 4b-c and Additional file 1: Figure S4) was calculated as the sequencing read length  
577 minus the barcode sequence and minus clipped off bases for poor quality at the ends of reads. For  
578 peritoneal fluid samples sequenced with both CRISPR-DS and standard-DS, *TP53* biological background  
579 mutation frequency was calculated as the number of *TP53* mutations in *TP53* exons 4 to 10 (excluding  
580 the tumor mutation) divided by the total number of nucleotides sequenced in those exons. The 95%  
581 confidence intervals were calculated in R using the Clopper-Pearson 'exact' method for binomial  
582 distributions.

583

584

585

586 **ABBREVIATIONS**

587 **DS:** Duplex Sequencing **DCS:** Double-stranded consensus sequence **SSCS:** Single-stranded consensus  
588 sequence **gRNA:** Guide RNA **crRNA:** CRISPR RNA **tracrRNA:** Trans-activating crRNA **NGS:** Next-  
589 generation Sequencing **ng:** Nanogram **bp:** Basepair **ssDNA:** Single-stranded DNA **dsDNA:** Double-  
590 stranded DNA **DIN:** DNA integrity number

591

592 **DECLARATIONS**

593

594 **Ethics approval and consent to participate**

595 Samples in these studies were obtained from: (1) the University of Washington Gynecologic Oncology  
596 Tissue Bank, which collected specimens and clinical information after informed consent under protocol  
597 number 27077 approved by the University of Washington Human Subjects Division institutional review  
598 board; (2) the University of Washington Genitourinary Cancer Specimen Biorepository and from not  
599 previously fixed or frozen autopsy tissue with waiver of consent under protocol number 52389 approved  
600 by the Fred Hutchinson Cancer Research Center Human Subjects Division institutional review board.

601 **Consent for publication**

602 All the samples in the study were de-identified. Consent for publication is included under the informed  
603 consent for research described above.

604 **Availability of data and material**

605 Sequencing data that supports the findings of this study have been deposited in the Sequence Read  
606 Archive (BioProject ID: [PRJNA412416](https://www.ncbi.nlm.nih.gov/bioproject/PRJNA412416)). Software for CRISPR-DS data analysis is available at  
607 <https://github.com/risqueslab/CRISPR-DS>.

608 **Competing interests**

609 SRK is a consultant and equity holder for TwinStrand Biosciences Inc. JJS is a founder and equity holder  
610 in TwinStrand Biosciences Inc. RAR is the principal investigator on a NIH SBIR R44CA221426  
611 subcontract research agreement with TwinStrand Biosciences Inc.

612 **Funding**

613 Research reported in this publication was supported by grants from the NIH under award numbers  
614 R01CA160674 and R01CA181308 to RAR; Mary Kay Foundation grant 045-15 to RAR. Cooperative  
615 Agreement Number W911NF-15-2-0127 from the Department of Defense Army Research Office/Defense  
616 Forensic Science Center(DFSC), as well as grant W81XWH-16-1-0579 from the Department of Defense  
617 Congressionally Directed Medical Research Program to SRK. The views and conclusions contained in  
618 this document are those of the authors and should not be interpreted as representing the official policies,  
619 either expressed or implied, of the Army Research Office, DFSC, or the U.S. Government. The U.S.  
620 Government is authorized to reproduce and distribute reprints for Government purposes notwithstanding  
621 any copyright notation hereon.

622 **Authors' contributions**

623 S.R.K. conceived the idea; D.N. S.R.K., and R.A.R. developed the method; D.N. and R.A.R. designed  
624 the experiments; D.N., S.L., E.K.S., M.J.H., K.B., K.L.S., B.F.K., R.A.R, and S.R.K. carried out  
625 experiments and/or performed data analysis; M.T. provided samples and scientific input; Y.Z., and J.S.  
626 contributed to assay development and provided invaluable critical discussion; D.N. S.R.K. and R.A.R.  
627 wrote the paper.

628 **Acknowledgements**

629 We thank Shilpa Kumar for assistance with computational analysis, Emily Kohlbrenner for technical  
630 support and helpful discussions, Penny Faires for critical reading and copy editing of the manuscript, and  
631 the Genitourinary Cancer Specimen Biorepository for providing access to bladder cases (Director Dr  
632 Colm Morrissey, PhD), We thank the University of Washington Gynecologic Oncology Tissue Bank for  
633 providing peritoneal fluid DNA and the Brigham and Women's Hospital/Harvard Cohorts Biorepository for  
634 sending archived samples from the Nurses' Health Study for pilot testing.

635

636

637



638 **TABLES**

639

**Table 1:** Target enrichment due to size selection

| <b>Sample</b> | <b>DNA Input<br/>(ng)</b> | <b>Reads On<br/>Target (%)</b> | <b>Fold<br/>Enrichment</b> |
|---------------|---------------------------|--------------------------------|----------------------------|
| B9            | 25                        | 0.76%                          | 7,527                      |
|               | 200                       | 0.25%                          | 2,452                      |
|               | 250                       | 0.21%                          | 2,037                      |
| PF1           | 10                        | 2.85%                          | 28,139                     |
|               | 25                        | 1.99%                          | 19,583                     |
|               | 100                       | 0.68%                          | 6,667                      |
|               | 250                       | 0.70%                          | 6,878                      |
| PF5           | 10                        | 5.05%                          | 49,794                     |
|               | 25                        | 0.96%                          | 9,456                      |
|               | 100                       | 0.34%                          | 3,321                      |
|               | 250                       | 0.22%                          | 2,217                      |

640

641

642

643

644

645

646

647

648

649

650

651

652

653

654

655

**Table 2.** Comparison of Standard-DS vs CRISPR-DS for four different samples with *TP53* mutations.

| Method      | Sample | Input DNA (ng) | Raw Reads On Target | Median Final Depth* | Recovery (%) | Tumor Mutation     | Mutant Allele Fraction |
|-------------|--------|----------------|---------------------|---------------------|--------------|--------------------|------------------------|
| Standard-DS | PF1    | 9,196          | 92.4%               | 2742                | 0.09%        | chr17:g.7578275G>A | 68.5%                  |
|             | PF2    | 3,000          | 92.8%               | 5381                | 0.54%        | chr17:g.7577548C>T | 1.2%                   |
|             | PF3    | 10,186         | 95.9%               | 1866                | 0.06%        | chr17:g.7578403C>T | 1.6%                   |
|             | PF4    | 7,436          | 95.4%               | 2029                | 0.08%        | chr17:g.7578526C>T | 0.6%                   |
| CRISPR-DS   | PF1    | 100            | 76.6%               | 2039                | 6.18%        | chr17:g.7578275G>A | 68.4%                  |
|             | PF2    | 100            | 94.3%               | 2831                | 8.58%        | chr17:g.7577548C>T | 1.0%                   |
|             | PF3    | 100            | 87.6%               | 3801                | 11.52%       | chr17:g.7578403C>T | 0.4%                   |
|             | PF4    | 100            | 96.5%               | 2194                | 6.65%        | chr17:g.7578526C>T | 0.1%                   |

\*After final Duplex Sequencing data processing is performed

657 **FIGURES**

658

659 Figure 1. Schematic representation of key aspects of CRISPR-DS. (a) CRISPR/Cas9 digestion of *TP53*.  
660 Seven fragments containing all *TP53* coding exons were excised via targeted cutting using gRNAs. Dark  
661 grey represents reference strand and light grey represents the anti-reference strand. (b) Size selection  
662 using 0.5x SPRI beads. Uncut, genomic DNA binds to the beads and allows the recovery of the  
663 homogenously sized excised fragments in solution. (c) Double-stranded DNA molecule fragmented and  
664 ligated with DS-adapters. Adapters are double-stranded and contain 10-bp of random, complementary  
665 nucleotides and a 3'-dT overhang. (d) Error correction by DS. Reads derived from the same strand of  
666 DNA are compared to form a Single-Strand Consensus Sequence (SSCS). Then both strands of the  
667 same original DNA molecule are compared with one another to create a Double-Strand Consensus  
668 Sequence (DCS). Only mutations found in both SSCS reads are counted as true mutations in DCS reads.

669

670 Figure 2. Comparison of library preparation protocols for standard-DS vs. CRISPR-DS. The primary  
671 differences between the CRISPR-DS and standard-DS library preparation are the fragmentation  
672 techniques and the number of hybridization capture steps. Instead of fragmentation by sonication as  
673 performed in standard-DS, CRISPR-DS relies on an *in vitro* excision of target regions by CRISPR/Cas9  
674 followed by size selection for the excised fragments. The size selection eliminates the need for a second  
675 round of hybridization capture which is required for sufficient target enrichment in the standard-DS  
676 protocol. CRISPR-DS reduces the workflow by nearly a day. Colored boxes represent 1h of time.

677

678 Figure 3. Visualization of sequencing libraries and data prepared with CRISPR-DS and standard-DS. (a)  
679 TapeStation gels show distinct bands for CRISPR-DS as opposed to a smear for standard-DS. The size  
680 of bands corresponds to the CRISPR/Cas9 cut fragments with adapters. (b) CRISPR-DS  
681 electropherograms allow visualization and quantification of peaks for quality control of the library prior to  
682 sequencing. Standard-DS electropherograms show a diffuse peak that harbors no information about the

683 specificity of the library. (c) Dots represent original barcoded DNA molecules. Each DNA molecule has  
684 multiple copies generated at PCR (x-axis). In CRISPR-DS, all DNA molecules (red dots) have preset  
685 sizes (y-axis) and generate similar number of PCR copies. In standard-DS, sonication shears DNA into  
686 variable fragment lengths (blue dots). Smaller fragments amplify better and generate an excess of copies  
687 that waste sequencing resources. (d) Integrative Genomics Viewer of *TP53* coverage with DCS reads  
688 generated by CRISPR-DS and standard-DS. CRISPR-DS shows distinct boundaries that correspond to  
689 the CRISPR/Cas9 cutting points and an even distribution of depth across positions, both within a fragment  
690 and between fragments. Standard-DS shows the typical 'peak' pattern generated by random shearing of  
691 fragments and hybridization capture, which leads to variable coverage.

692

693 Figure 4. CRISPR/Cas9 fragmentation produces optimal fragment lengths. (a) Sonication produces  
694 fragments that are either too short or too long, corresponding to redundant or lost information,  
695 respectively. CRISPR-DS produces optimally sized fragments which are perfectly covered by the  
696 sequencing reads. (b-c) Comparison of histograms of the insert sizes of two samples prepared with  
697 standard-DS (*blue*, left panels), which uses sonication for fragmentation, and CRISPR-DS (*red*, right  
698 panels), which uses CRISPR/Cas9 digestion for fragmentation, The x-axis represents the percent  
699 difference from the optimally sized fragment, e.g. fragment size that matches the sequencing read length  
700 after adjustments for molecular barcodes and clipping. Yellow shading highlights range of fragment sizes  
701 which are within 10% difference from optimal size.

702

703 Figure 5. Technical comparison of 250ng, 100ng and 25ng of DNA sequenced with both standard-DS  
704 and CRISPR-DS. Measurements were obtained by sequencing samples prepared with standard-DS  
705 (*blue*) using one and two rounds of hybridization capture and CRISPR-DS (*red*) with only one round of  
706 hybridization capture. (a) The percentage of raw sequencing reads on-target (covering *TP53*) was  
707 comparable between Standard-DS with two rounds of capture and CRISPR-DS with one round of  
708 capture, demonstrating the target enrichment efficiency of the novel method. (b) Percentage recovery

709 was calculated as the percentage of genomes in input DNA that produced DCS reads. CRISPR-DS  
710 increases recovery thanks to the initial CRISPR-based target enrichment, which eliminates one round of  
711 hybridization capture. (c) After creating DCS reads, the median DCS depth across all targeted regions  
712 was calculated for each input amount. The increased recovery enabled by CRISPR-DS translates into 5-  
713 10 times more sequencing depth for the same input DNA.

714

715

716 **ADDITIONAL FILE 1:**

717 **SUPPLEMENTARY FIGURES**

718 Figure S1. Comparison of mutation limit detection by sequencing accuracy

719 Figure S2. Timeline of library preparation for CRISPR-DS and standard-DS

720 Figure S3. Homopolymer region produces suboptimal sequencing near *TP53* exon 7

721 Figure S4. Fraction of reads within 10% of optimal insert size: CRISPR-DS vs standard-DS

722 Figure S5. Target enrichment for CRISPR-DS with one vs. two captures

723 Figure S6. Pre-enrichment for high molecular weight DNA with BluePippin

724 Figure S7. Comparison of *TP53* biological background mutation frequency measured by Standard-DS  
725 and CRISPR-DS

726 Figure S8. Overview of CRISPR-DS data processing

727 Figure S9. Control CRISPR/Cas9 digestion of *TP53* gRNAs

728

729 **ADDITIONAL FILE 2:**

730 **SUPPLEMENTARY TABLES**

731 Table S1. crRNA sequences for *TP53* CRISPR/Cas9 digestion

732 Table S2. *TP53* hybridization capture probes

733 Table S3. CRISPR-DS sequencing results for 15 samples processed with 250ng input DNA

734

735 **ADDITIONAL FILE 3:**

736 **SUPPLEMENTARY DATA**

737 Data S1. *TP53* sequence with crRNA and capture probes

738 Data S2. GeneBlock sequence

739

740 **REFERENCES**

- 741 1. Kebschull JM, Zador AM: Sources of PCR-induced distortions in high-throughput sequencing data  
742 sets. *Nucleic Acids Res* 2015, 43:e143.
- 743 2. Samorodnitsky E, Jewell BM, Hagopian R, Miya J, Wing MR, Lyon E, Damodaran S, Bhatt D,  
744 Reeser JW, Datta J, Roychowdhury S: Evaluation of Hybridization Capture Versus Amplicon-  
745 Based Methods for Whole-Exome Sequencing. *Hum Mutat* 2015, 36:903-914.
- 746 3. Park G, Park JK, Shin SH, Jeon HJ, Kim NKD, Kim YJ, Shin HT, Lee E, Lee KH, Son DS, et al:  
747 Characterization of background noise in capture-based targeted sequencing data. *Genome Biol*  
748 2017, 18:136.
- 749 4. Knierim E, Lucke B, Schwarz JM, Schuelke M, Seelow D: Systematic comparison of three  
750 methods for fragmentation of long-range PCR products for next generation sequencing. *PLoS*  
751 *One* 2011, 6:e28240.
- 752 5. Goodwin S, McPherson JD, McCombie WR: Coming of age: ten years of next-generation  
753 sequencing technologies. *Nat Rev Genet* 2016, 17:333-351.
- 754 6. Fox EJ, Reid-Bayliss KS, Emond MJ, Loeb LA: Accuracy of Next Generation Sequencing  
755 Platforms. *Next Gener Seq Appl* 2014, 1.
- 756 7. Arbeithuber B, Makova KD, Tiemann-Boege I: Artfactual mutations resulting from DNA lesions  
757 limit detection levels in ultrasensitive sequencing applications. *DNA Res* 2016, 23:547-559.
- 758 8. Chen L, Liu P, Evans TC, Jr., Ettwiller LM: DNA damage is a pervasive cause of sequencing  
759 errors, directly confounding variant identification. *Science* 2017, 355:752-756.

- 760 9. Akogwu I, Wang N, Zhang C, Gong P: A comparative study of k-spectrum-based error correction  
761 methods for next-generation sequencing data analysis. *Hum Genomics* 2016, 10 Suppl 2:20.
- 762 10. Laehnemann D, Borkhardt A, McHardy AC: Denoising DNA deep sequencing data-high-  
763 throughput sequencing errors and their correction. *Brief Bioinform* 2016, 17:154-179.
- 764 11. Kinde I, Wu J, Papadopoulos N, Kinzler KW, Vogelstein B: Detection and quantification of rare  
765 mutations with massively parallel sequencing. *Proc Natl Acad Sci U S A* 2011, 108:9530-9535.
- 766 12. Hoang ML, Kinde I, Tomasetti C, McMahon KW, Rosenquist TA, Grollman AP, Kinzler KW,  
767 Vogelstein B, Papadopoulos N: Genome-wide quantification of rare somatic mutations in normal  
768 human tissues using massively parallel sequencing. *Proc Natl Acad Sci U S A* 2016, 113:9846-  
769 9851.
- 770 13. Schmitt MW, Kennedy SR, Salk JJ, Fox EJ, Hiatt JB, Loeb LA: Detection of ultra-rare mutations  
771 by next-generation sequencing. *Proc Natl Acad Sci U S A* 2012, 109:14508-14513.
- 772 14. Kennedy SR, Schmitt MW, Fox EJ, Kohn BF, Salk JJ, Ahn EH, Prindle MJ, Kuong KJ, Shen JC,  
773 Risques RA, Loeb LA: Detecting ultralow-frequency mutations by Duplex Sequencing. *Nat Protoc*  
774 2014, 9:2586-2606.
- 775 15. Ahn EH, Lee SH, Kim JY, Chang CC, Loeb LA: Decreased Mitochondrial Mutagenesis during  
776 Transformation of Human Breast Stem Cells into Tumorigenic Cells. *Cancer Res* 2016, 76:4569-  
777 4578.
- 778 16. Kennedy SR, Salk JJ, Schmitt MW, Loeb LA: Ultra-sensitive sequencing reveals an age-related  
779 increase in somatic mitochondrial mutations that are inconsistent with oxidative damage. *PLoS*  
780 *Genet* 2013, 9:e1003794.
- 781 17. Krimmel JD, Schmitt MW, Harrell MI, Agnew KJ, Kennedy SR, Emond MJ, Loeb LA, Swisher EM,  
782 Risques RA: Ultra-deep sequencing detects ovarian cancer cells in peritoneal fluid and reveals  
783 somatic TP53 mutations in noncancerous tissues. *Proc Natl Acad Sci U S A* 2016, 113:6005-  
784 6010.

- 785 18. Reid-Bayliss KS, Arron ST, Loeb LA, Bezrookove V, Cleaver JE: Why Cockayne syndrome  
786 patients do not get cancer despite their DNA repair deficiency. *Proc Natl Acad Sci U S A* 2016,  
787 113:10151-10156.
- 788 19. Winters M, Monroe C, Barta JL, Kemp BM: Are we fishing or catching? Evaluating the efficiency  
789 of bait capture of CODIS fragments. *Forensic Science International-Genetics* 2017, 29:61-70.
- 790 20. Schmitt MW, Fox EJ, Prindle MJ, Reid-Bayliss KS, True LD, Radich JP, Loeb LA: Sequencing  
791 small genomic targets with high efficiency and extreme accuracy. *Nat Methods* 2015, 12:423-425.
- 792 21. Bennett-Baker PE, Mueller JL: CRISPR-mediated isolation of specific megabase segments of  
793 genomic DNA. *Nucleic Acids Res* 2017, 45:e165.
- 794 22. Shin G, Grimes SM, Lee H, Lau BT, Xia LC, Ji HP: CRISPR-Cas9-targeted fragmentation and  
795 selective sequencing enable massively parallel microsatellite analysis. *Nat Commun* 2017,  
796 8:14291.
- 797 23. Dabney J, Meyer M: Length and GC-biases during sequencing library amplification: a comparison  
798 of various polymerase-buffer systems with ancient and modern DNA sequencing libraries.  
799 *Biotechniques* 2012, 52:87-94.
- 800 24. Hsu PD, Scott DA, Weinstein JA, Ran FA, Konermann S, Agarwala V, Li Y, Fine EJ, Wu X, Shalem  
801 O, et al: DNA targeting specificity of RNA-guided Cas9 nucleases. *Nat Biotechnol* 2013, 31:827-  
802 832.
- 803 25. Jung H, Ji S, Song S, Park Y, Yang J, Schmidt E: The DNA Integrity Number (DIN) provided by  
804 the genomic DNA ScreenTape assay allows for streamlining of NGS on FFPE tissue samples.  
805 *Application Note Nucleic Acid Analysis* 2014
- 806 26. Li H: A statistical framework for SNP calling, mutation discovery, association mapping and  
807 population genetical parameter estimation from sequencing data. *Bioinformatics* 2011, 27:2987-  
808 2993.
- 809 27. Kozarewa I, Armisen J, Gardner AF, Slatko BE, Hendrickson CL: Overview of Target Enrichment  
810 Strategies. *Curr Protoc Mol Biol* 2015, 112:7 21 21-23.



- 811 28. Newman AM, Lovejoy AF, Klass DM, Kurtz DM, Chabon JJ, Scherer F, Stehr H, Liu CL, Bratman  
812 SV, Say C, et al: Integrated digital error suppression for improved detection of circulating tumor  
813 DNA. *Nat Biotechnol* 2016, 34:547-555.
- 814 29. Taylor PH, Cinquin A, Cinquin O: Quantification of in vivo progenitor mutation accrual with ultra-  
815 low error rate and minimal input DNA using SIP-HAVA-seq. *Genome Res* 2016, 26:1600-1611.
- 816 30. Mattox AK, Wang Y, Springer S, Cohen JD, Yegnasubramanian S, Nelson WG, Kinzler KW,  
817 Vogelstein B, Papadopoulos N: Bisulfite-converted duplexes for the strand-specific detection and  
818 quantification of rare mutations. *Proc Natl Acad Sci U S A* 2017, 114:4733-4738.
- 819 31. Ran FA, Hsu PD, Wright J, Agarwala V, Scott DA, Zhang F: Genome engineering using the  
820 CRISPR-Cas9 system. *Nat Protoc* 2013, 8:2281-2308.
- 821 32. Robinson JT, Thorvaldsdottir H, Winckler W, Guttman M, Lander ES, Getz G, Mesirov JP:  
822 Integrative genomics viewer. *Nat Biotechnol* 2011, 29:24-26.
- 823 33. Li H, Durbin R: Fast and accurate long-read alignment with Burrows-Wheeler transform.  
824 *Bioinformatics* 2010, 26:589-595.

825

826

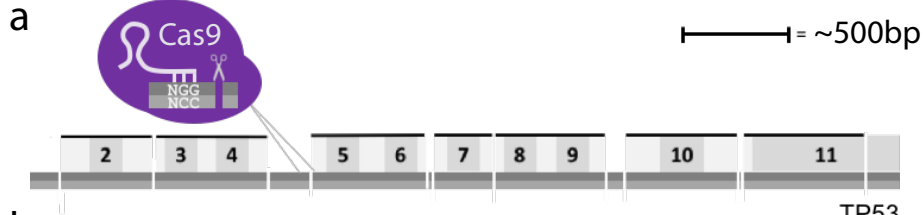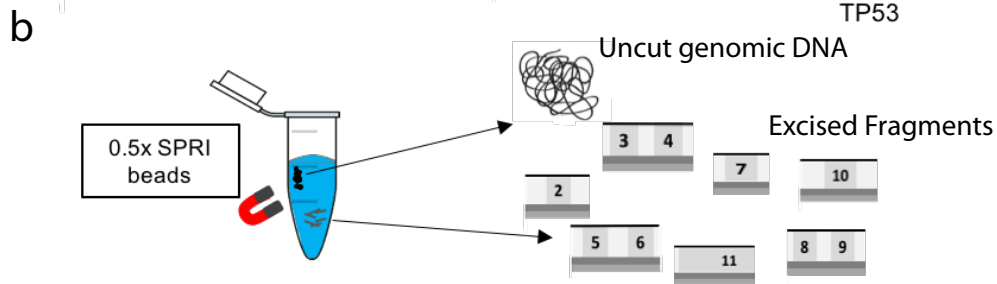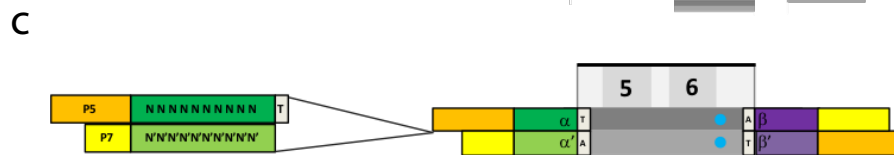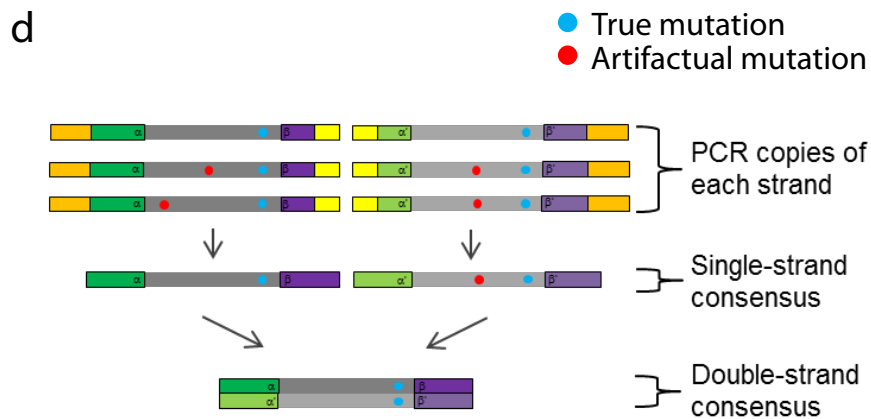

# CRISPR-DS

# Standard-DS

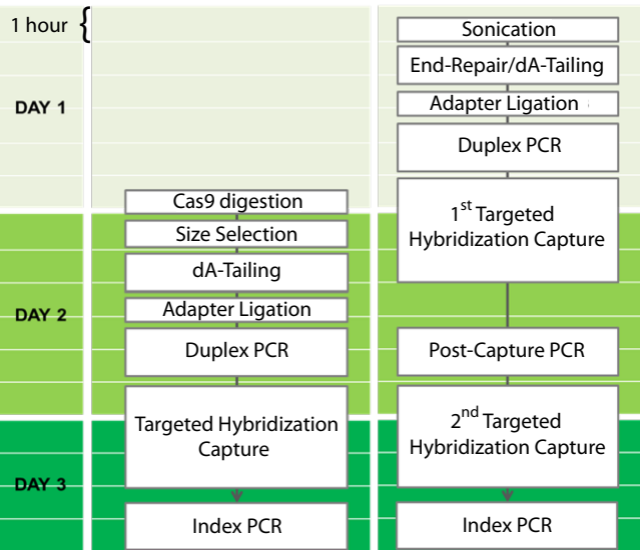

a

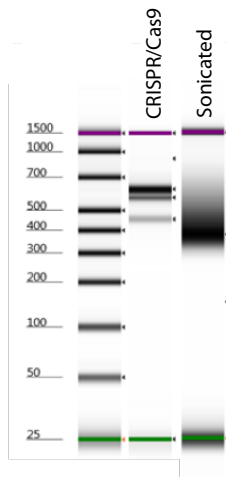

b

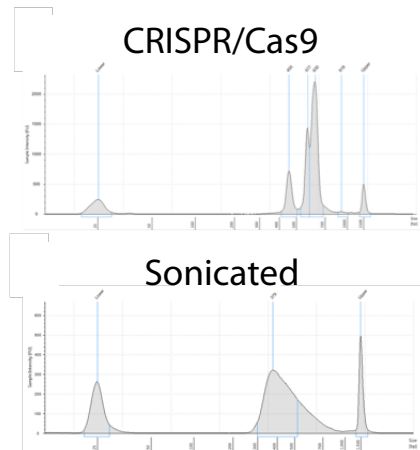

c

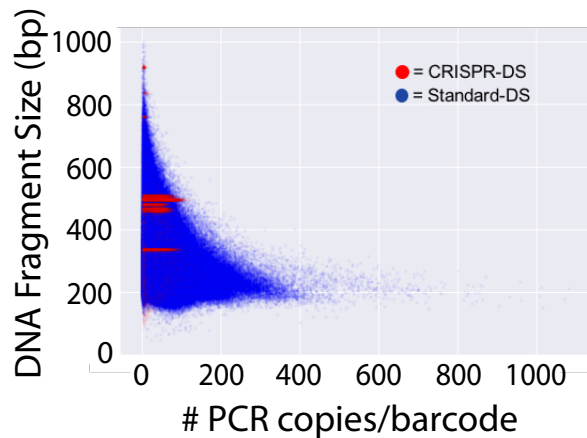

d

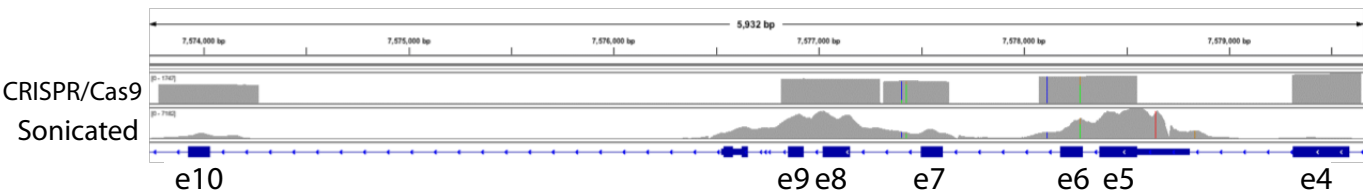

**a**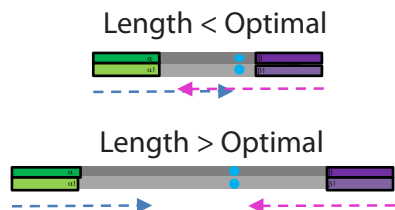

Length = Optimal

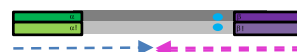**b**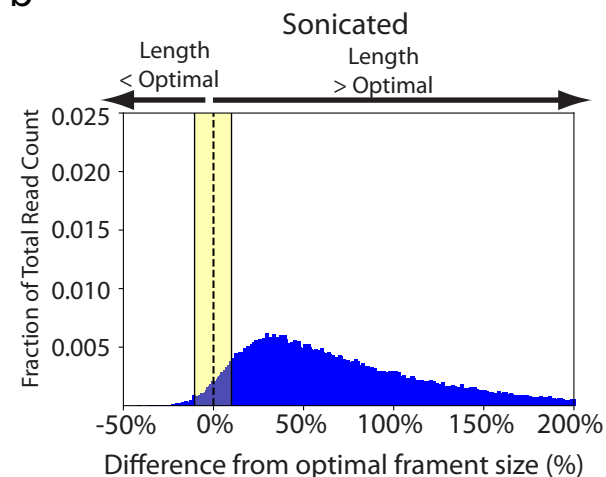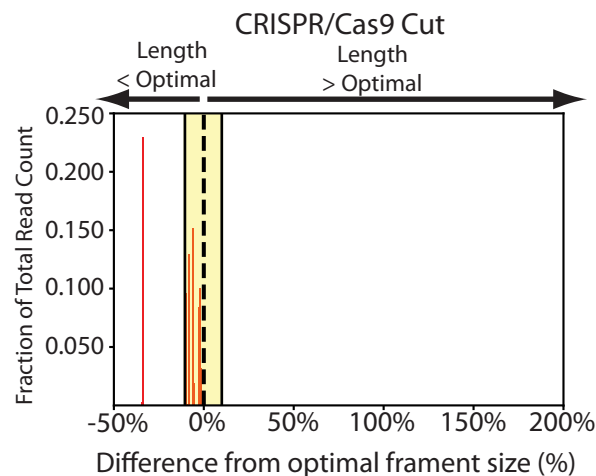**c**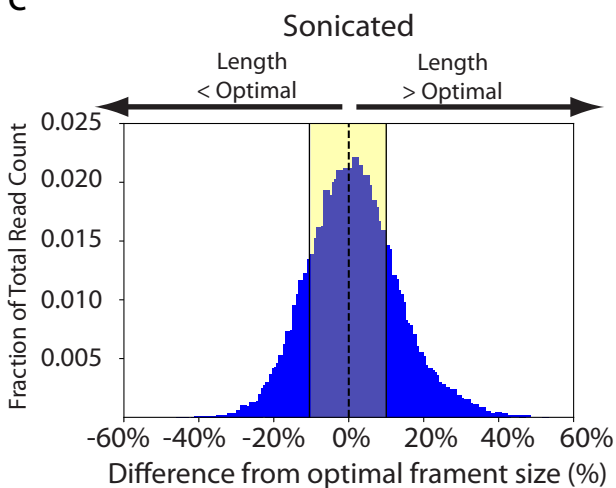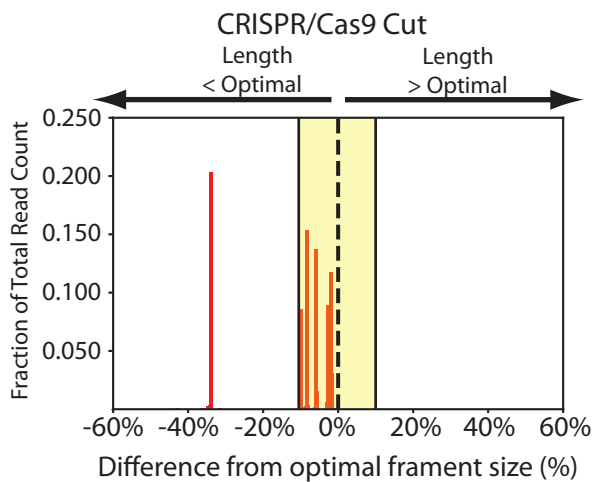

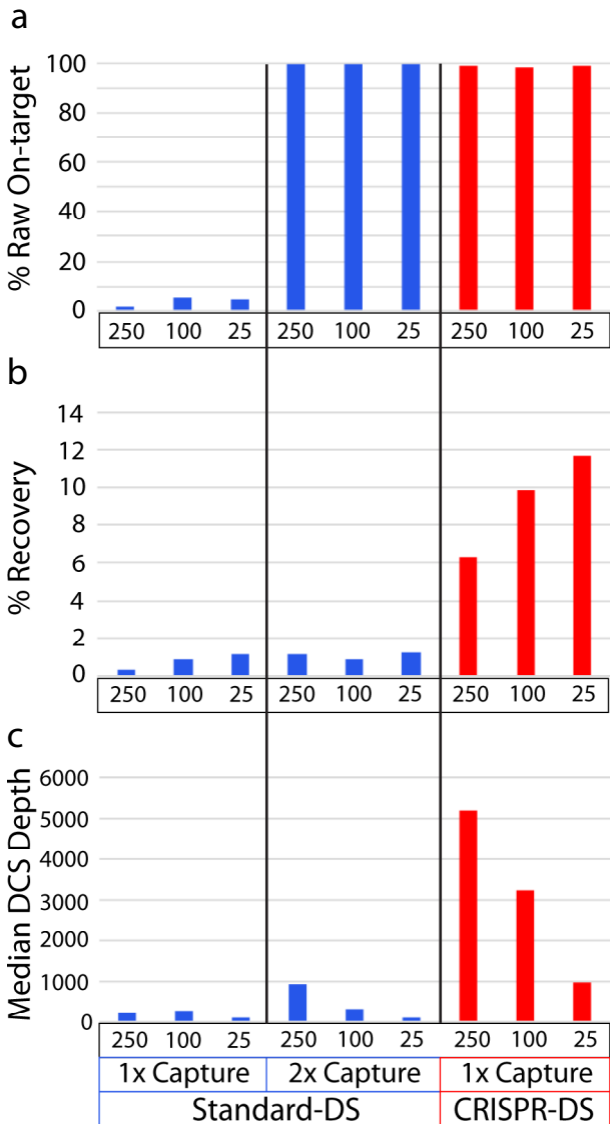

Source: https://www.biorxiv.org/content/10.1101/207027.full.pdf
